# Supplementary material for: Nano-sized Al2O3 particle-induced autophagy reduces osteolysis in aseptic loosening of total hip arthroplasty by negative feedback regulation of RANKL expression in fibroblasts
Source: PubMed Central journal article supplement (PMC6079072; doi:10.1038/s41419-018-0862-9), 2018-08-06

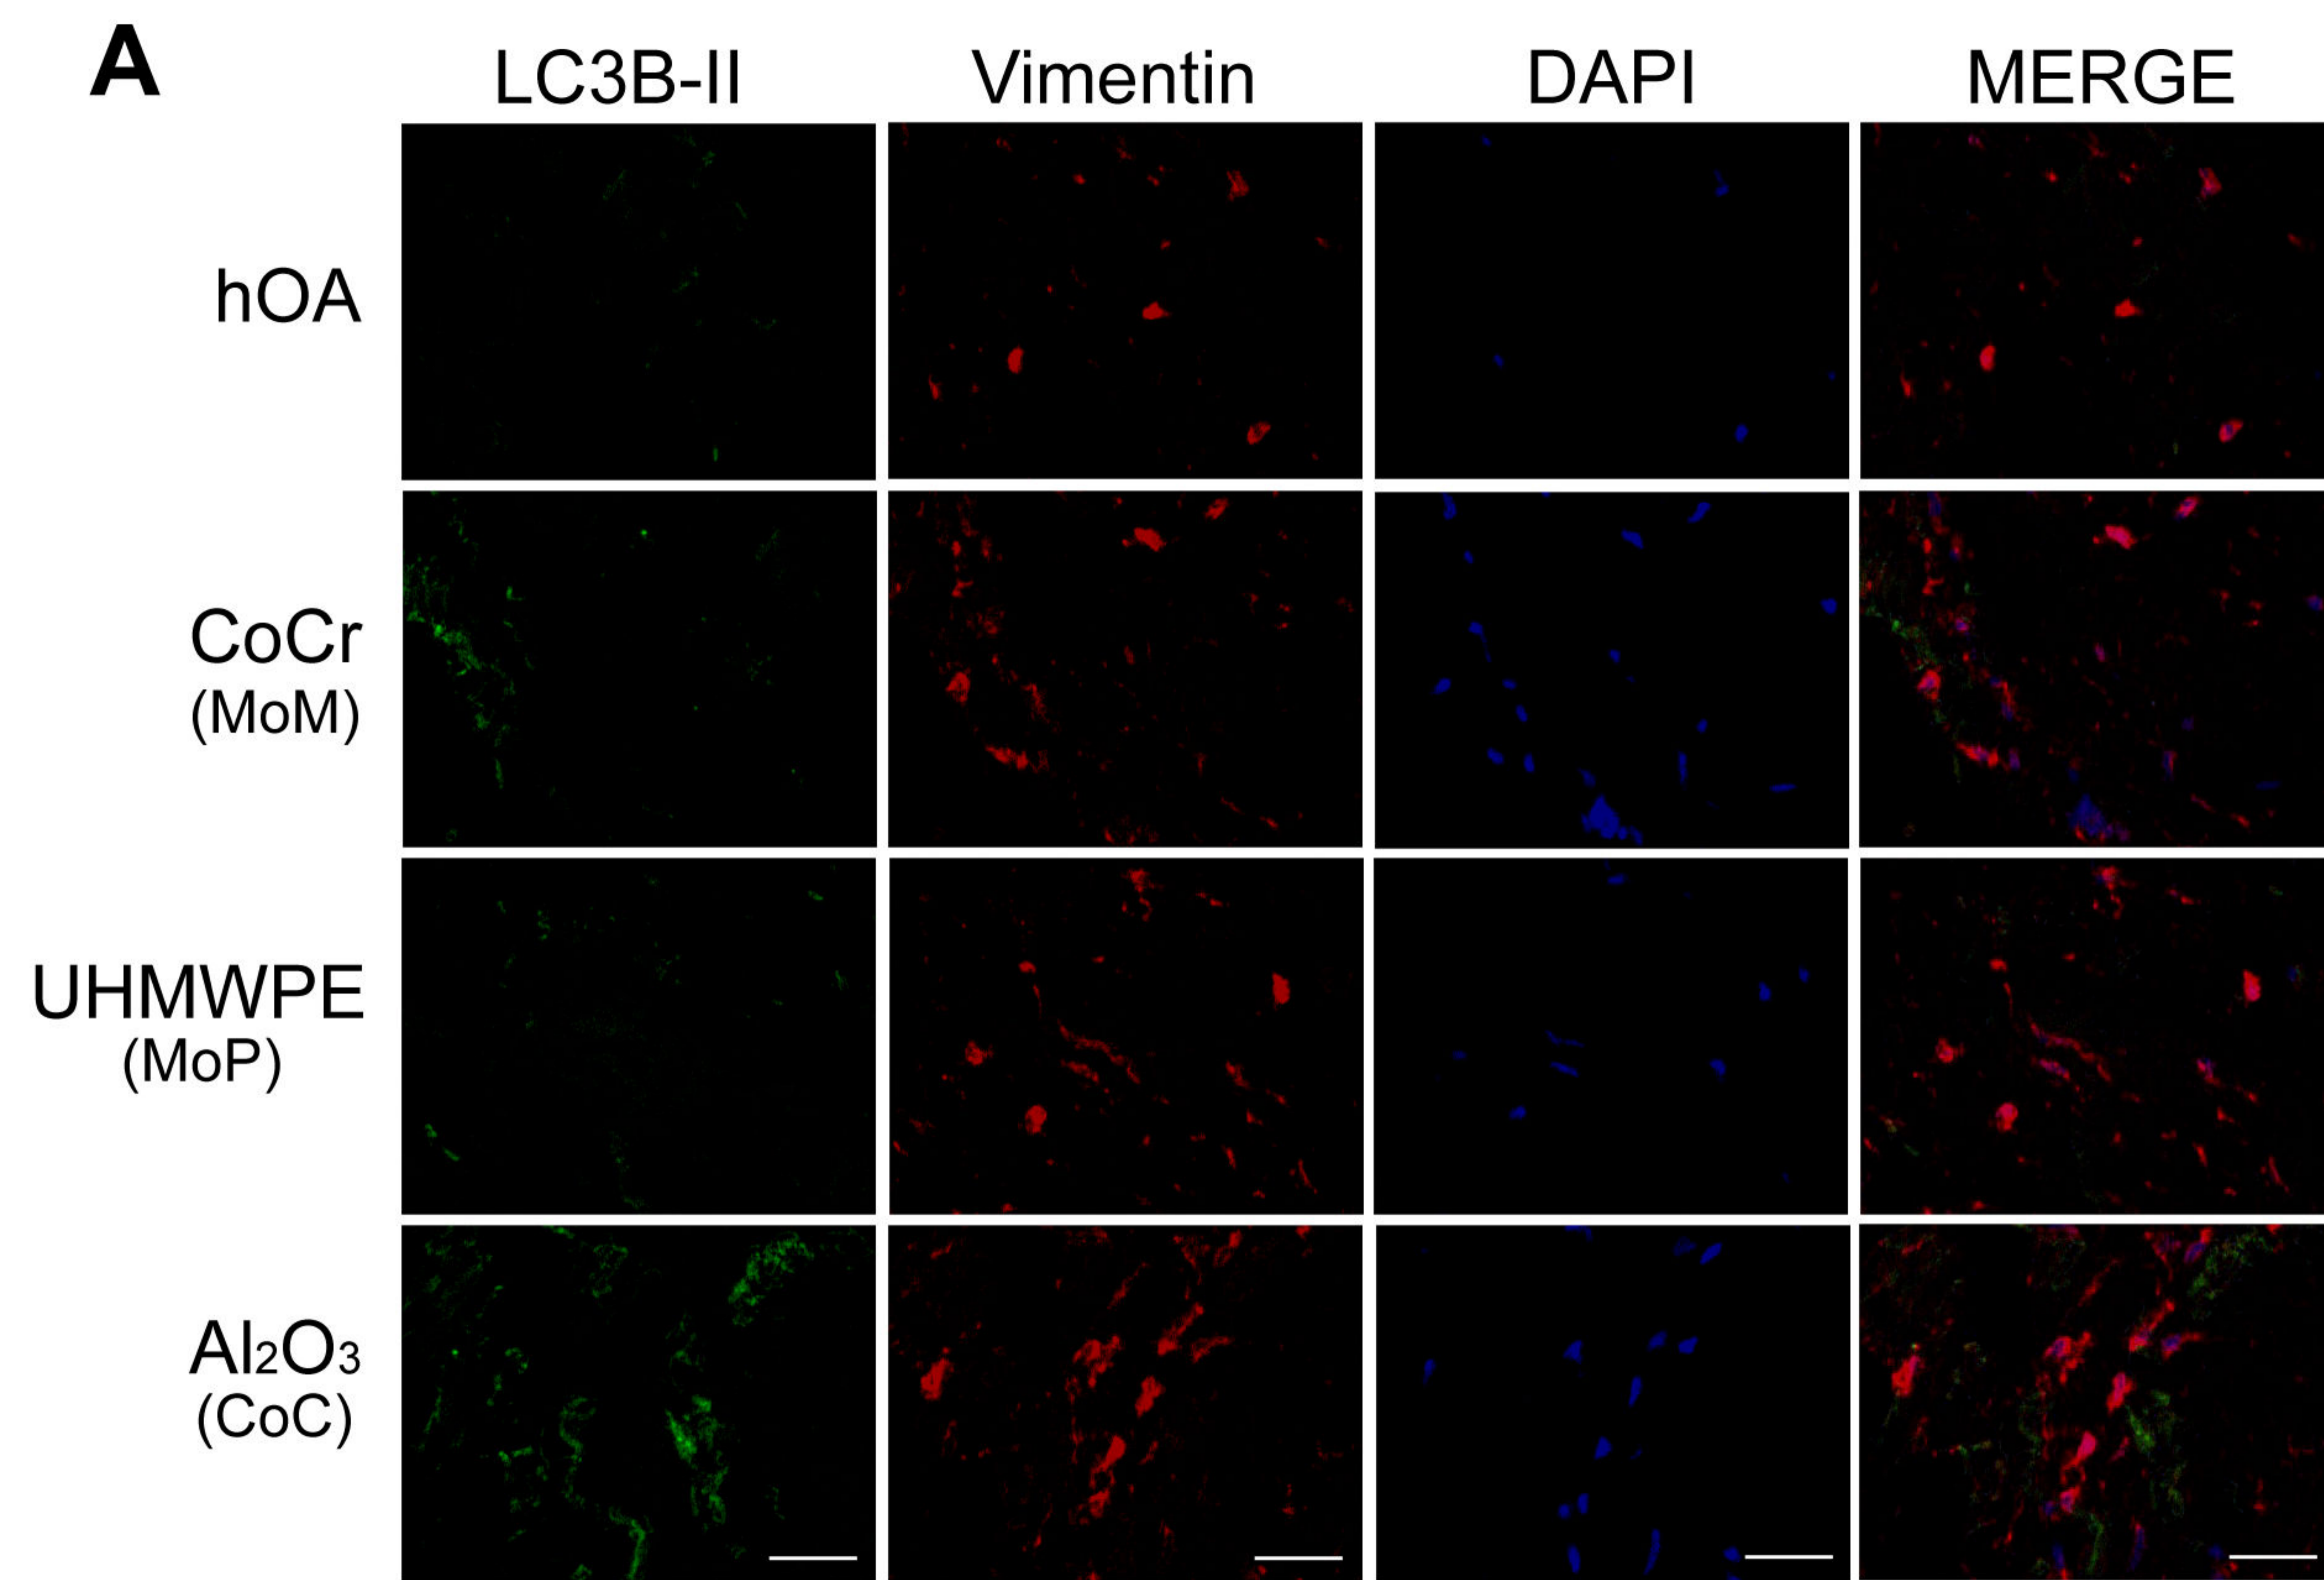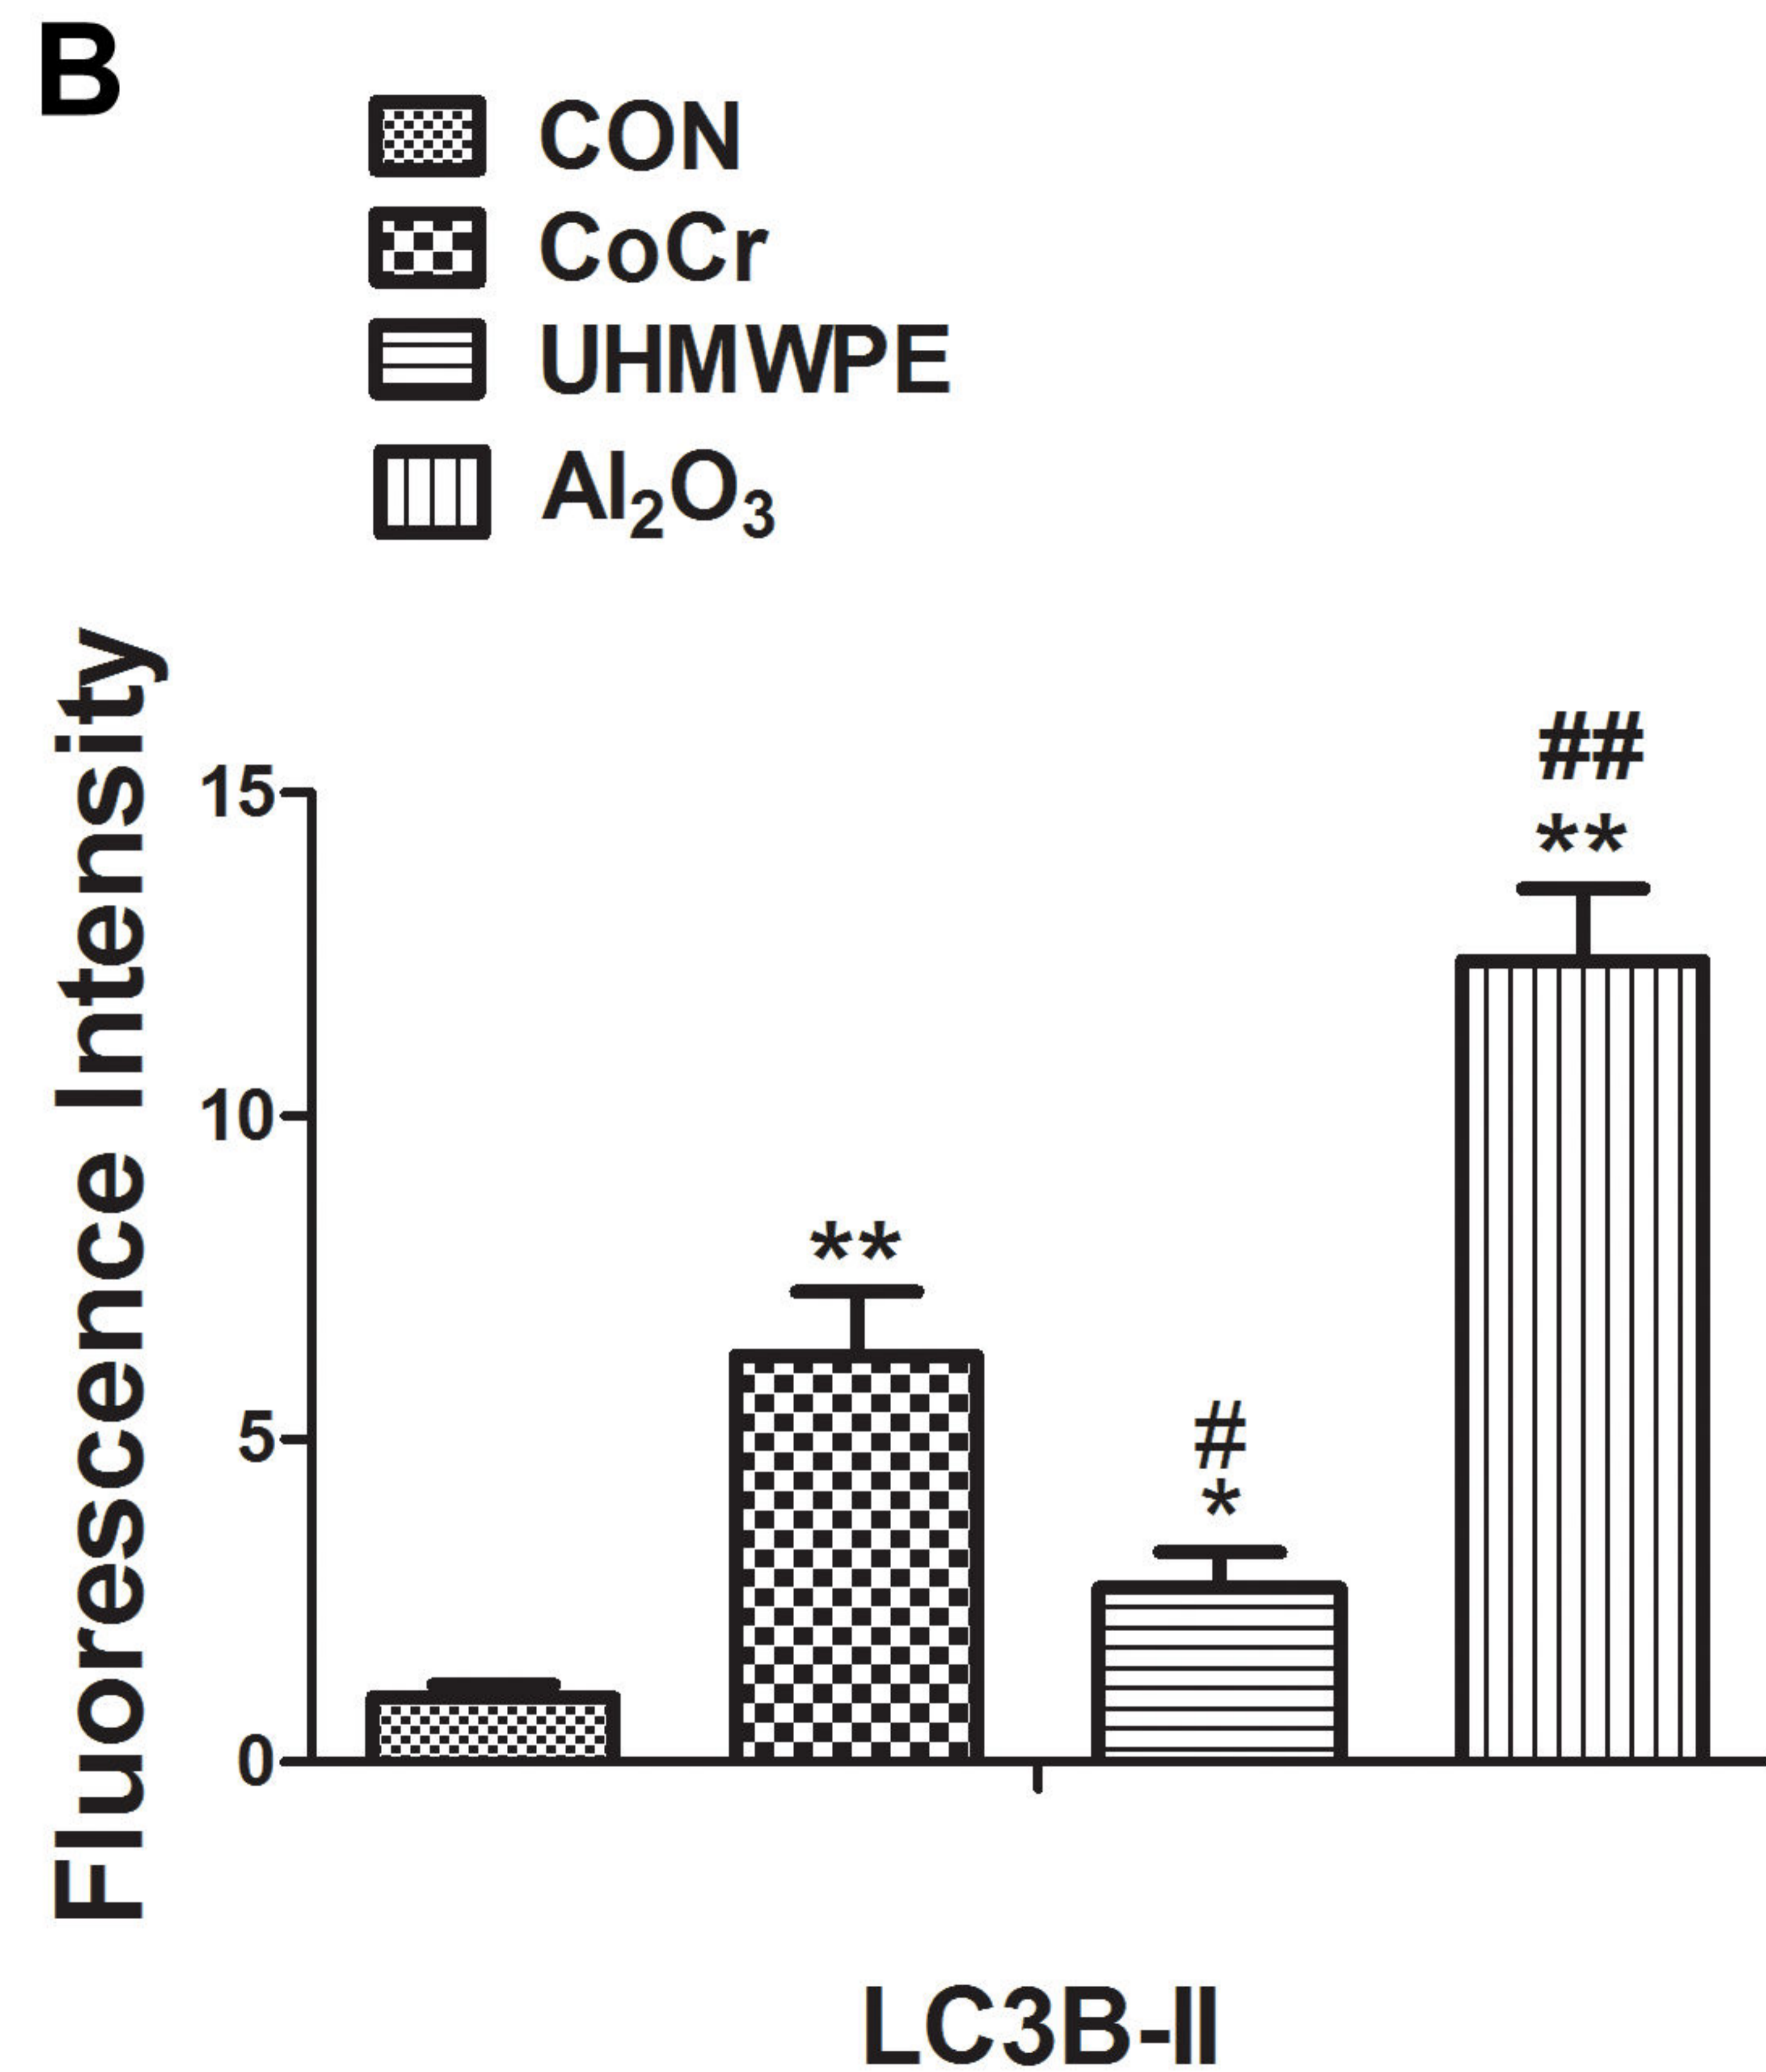

Supplement: 41419_2018_862_MOESM1_ESM.pdf [file 41419_2018_862_MOESM1_ESM.pdf]
